# Supplementary material
Source: publisher site journal article supplement (https://www.dovepress.com/article/438915)
Supplement: Supplementary file 1 [file get_supplementary_file.php]

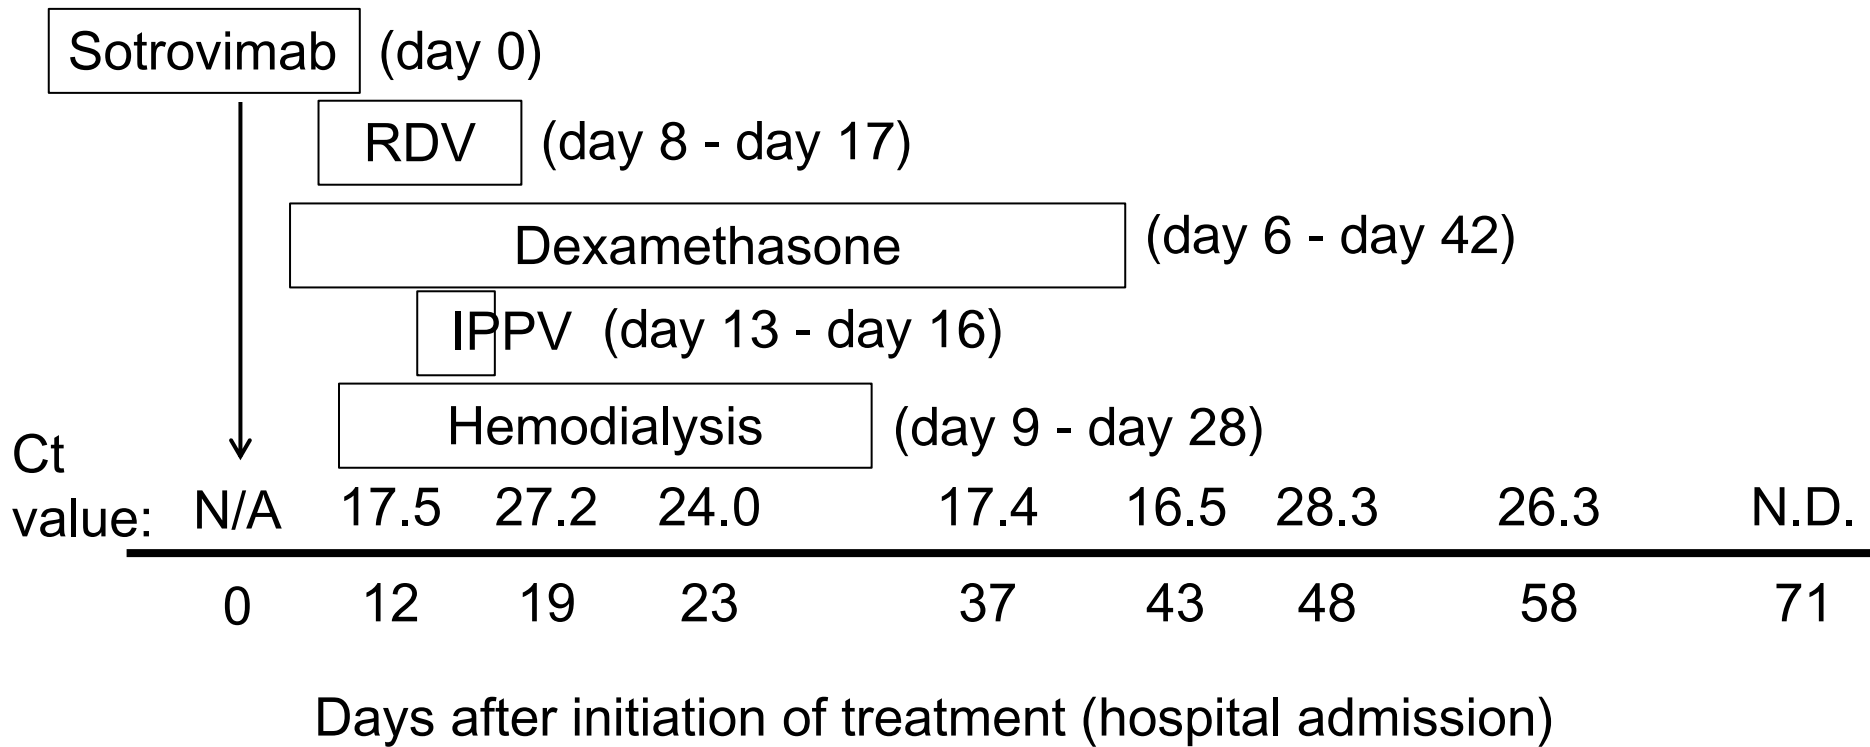

RDV : remdesivir, IPPV : invasive positive pressure ventilation.

**Supplementary Figure 1 Sample collection and course of treatment.**

Nasopharyngeal swabs were collected before treatment (day 0) and days 12, 19, 23, 37, 43, 48, 58, and 71 after the treatment. Sotrovimab infusion was performed at day 0. Dexamethasone and remdesivir were administered between day 6 and day 42 and between day 8 and day 17, respectively.

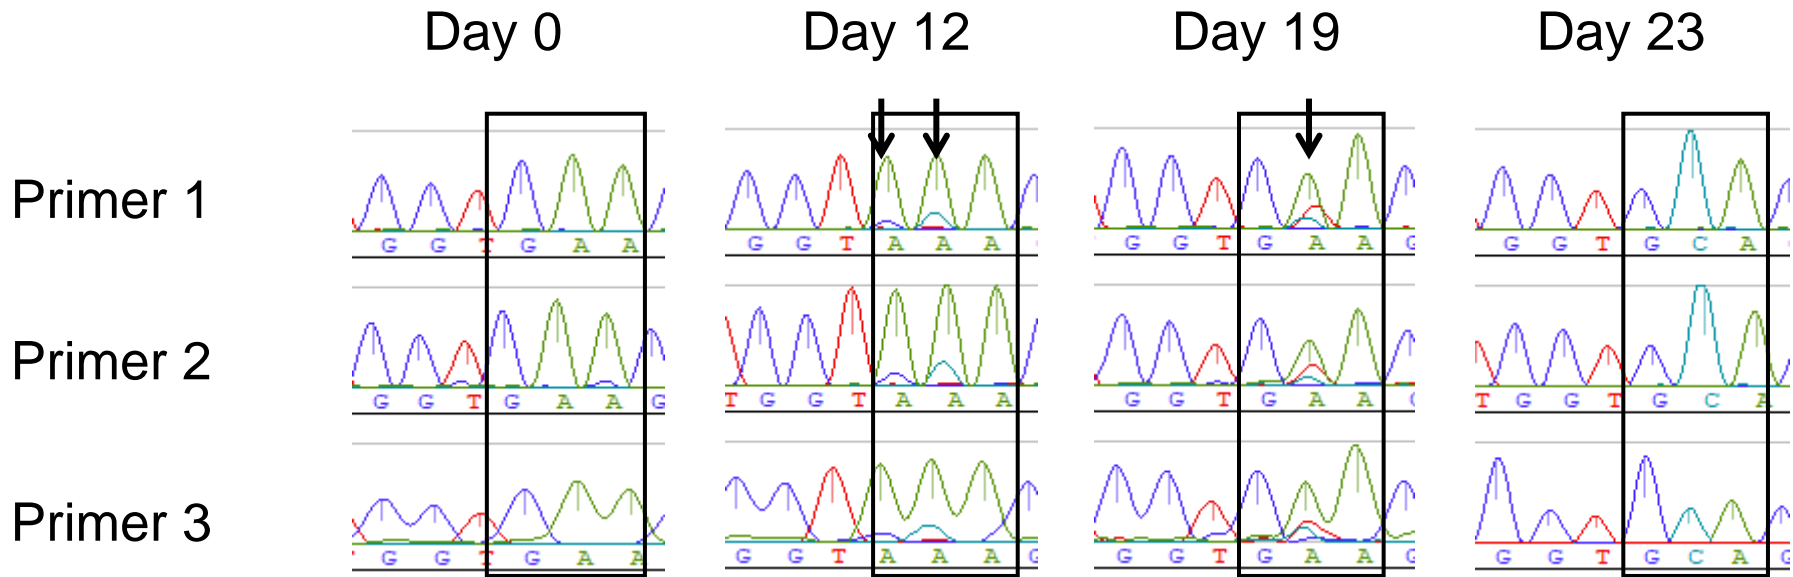

GAA(S:E340) → AAA(K), GAA(V), GCA(A)

**Supplementary Figure 2 Nucleotides of residue 340 at S protein indicated mixed population by sanger sequencing.**

The RBD region of S gene was sequenced on days 0 to 23. Three types of sequencing primers (primer 1-3) were used and three peaks at 22577-22582 (GGTGAA) were indicated. Arrows indicate mixed signals.



Supplementary Table2 Evaluation of escape ability of single amino acid substitutions at residues 340, 337, 346, and 494 of the spike gene against to sotrovimab using DMS analysis

| Variants | Codon | Mutation  | Type of mutation | Escape value # |
|----------|-------|-----------|------------------|----------------|
| E340     | GAA   | Wild type | -                | 1              |
| E340     | GAG   | A to G    | Transition       | 1              |
| K340     | AAA   | G to A    | Transition       | 1.36           |
| G340     | GGA   | A to G    | Transition       | 1.18           |
| A340     | GCA   | A to C    | Transversion     | 1.68           |
| V340     | GTA   | A to T    | Transversion     | 1.43           |
| Q340     | CAA   | G to C    | Transversion     | 1.47           |
| D340     | GAT   | A to T    | Transversion     | 0.81           |
| D340     | GAC   | A to C    | Transversion     | 0.81           |
| *340     | TAA   | A to C    | Transversion     | 0.41           |
| P337     | CCT   | Wild type | -                | 1              |
| S337     | TCT   | C to T    | Transition       | 0.83           |
| L337     | CTT   | C to T    | Transition       | 0.95           |
| P337     | CCC   | T to C    | Transition       | 1              |
| A337     | GCT   | C to G    | Transversion     | 0.72           |
| T337     | ACT   | C to A    | Transversion     | 0.78           |
| R337     | CGT   | C to G    | Transversion     | 1.61           |
| H337     | CAT   | C to A    | Transversion     | 0.89           |
| P337     | CCG   | T to G    | Transversion     | 1              |
| P337     | CCA   | T to A    | Transversion     | 1              |
| R346     | AGA   | Wild type | -                | 1              |
| G346     | GGA   | A to G    | Transition       | 0.87           |
| K346     | AAA   | G to A    | Transition       | 0.87           |
| R346     | AGG   | A to G    | Transition       | 1              |
| *346     | TGA   | A to T    | Transversion     | N/A            |
| R346     | CGA   | A to C    | Transversion     | 1              |
| I346     | ATA   | G to T    | Transversion     | 0.65           |
| T346     | ACA   | G to C    | Transversion     | 1.21           |
| S346     | AGT   | A to T    | Transversion     | 1.11           |
| S346     | AGC   | A to C    | Transversion     | 1.11           |
| S494     | TCA   | Wild type | -                | 1              |
| P494     | CCA   | T to C    | Transition       | 0.97           |
| L494     | TTA   | C to T    | Transition       | 0.82           |
| S494     | TCG   | A to G    | Transition       | 1              |
| A494     | GCA   | T to G    | Transversion     | 0.93           |
| T494     | ACA   | T to A    | Transversion     | 0.97           |
| *494     | TGA   | C to G    | Transversion     | 0.63           |
| *494     | TAA   | C to A    | Transversion     | 0.63           |
| S494     | TCT   | A to T    | Transversion     | 1              |
| S494     | TCC   | A to C    | Transversion     | 1              |

# The escape value was calculated as previously described [11] and in the Materials and Methods.
